# Supplementary material
Source: Springer Nature journal article supplement (https://www.springermedizin.de/resource/supplementary/12936_2008_905_MOESM4_ESM.pdf/9548506)

□ Experiment 1 (rural)

○ Experiment 2 (rural)

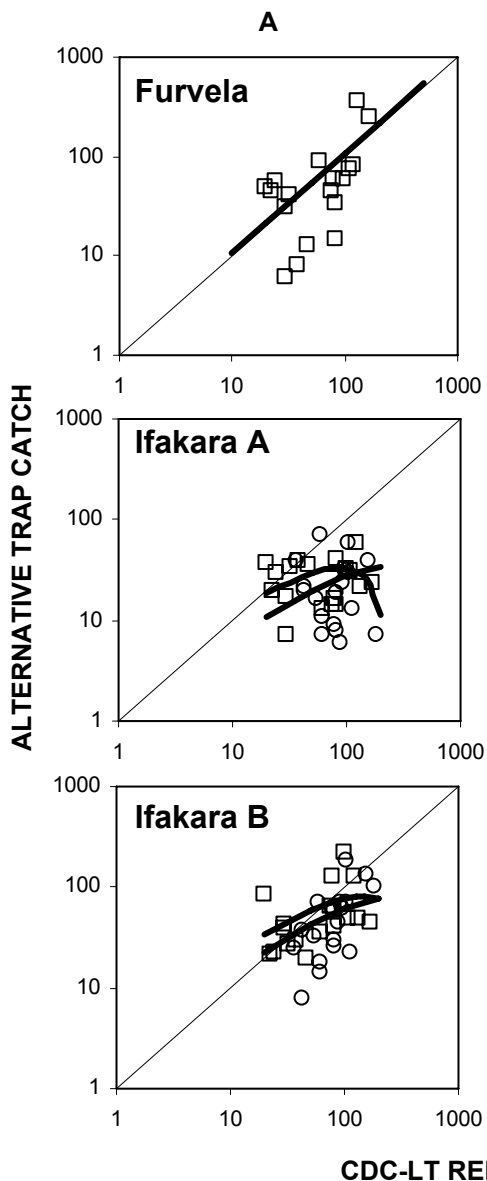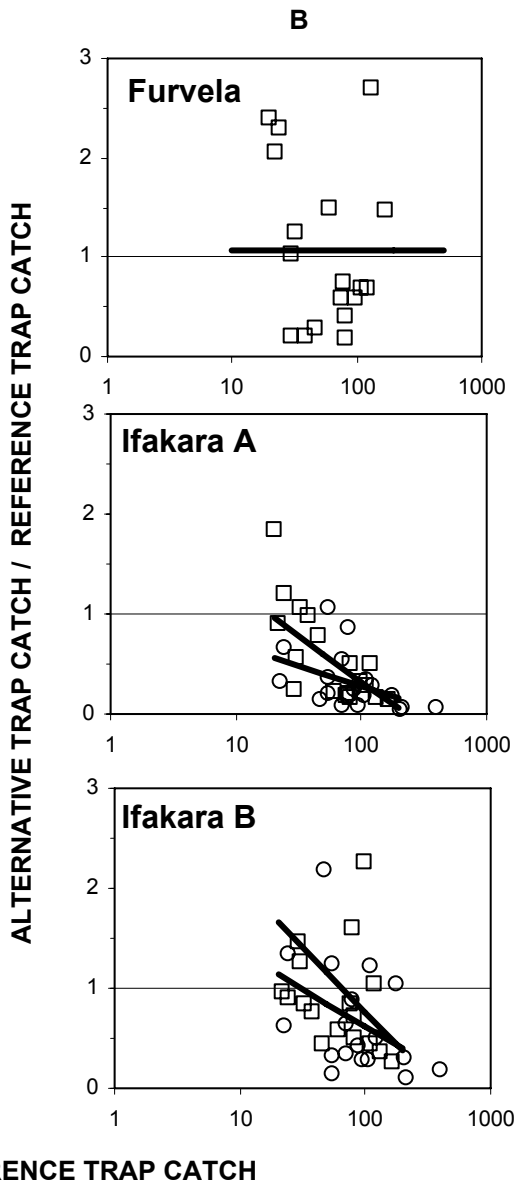

Supplement: MOESM4 [file 9548506]
